# Supplementary material
Source: PubMed Central journal article supplement (PMC7354885)

**A****Control**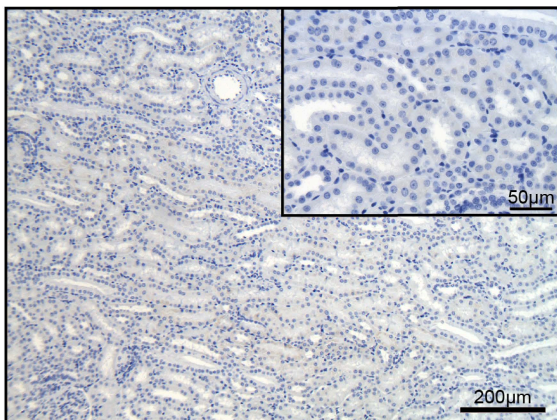**B****33460**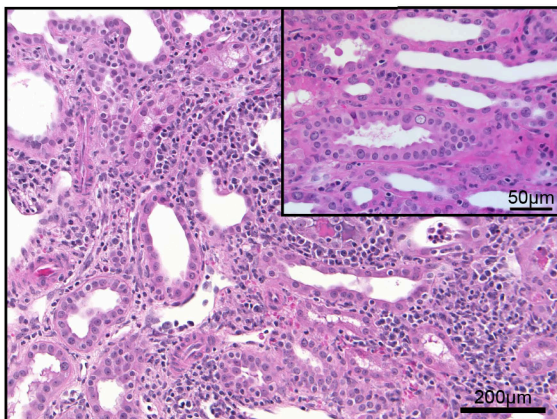**Control**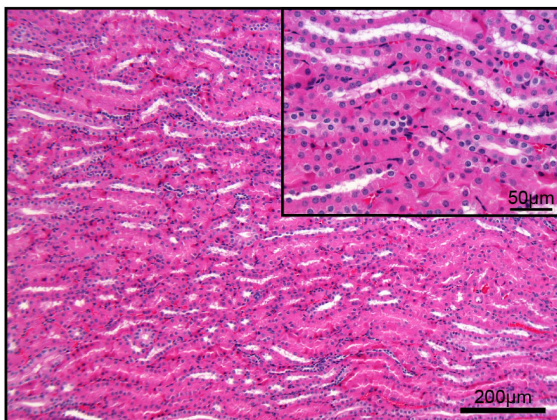

33460 plasma

Pre

d45  
(TOD)

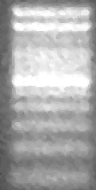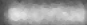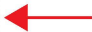

33459 urine

d38

d42

Water

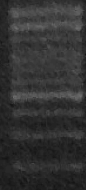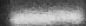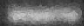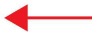

**A**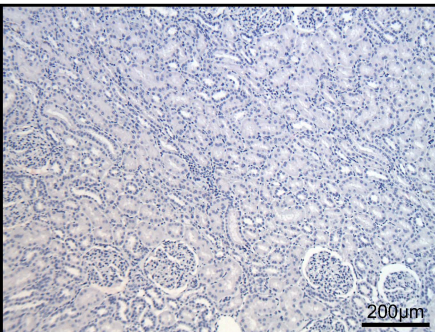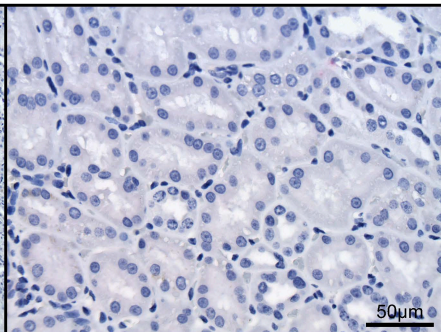**B**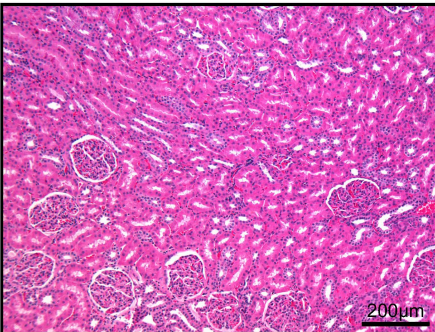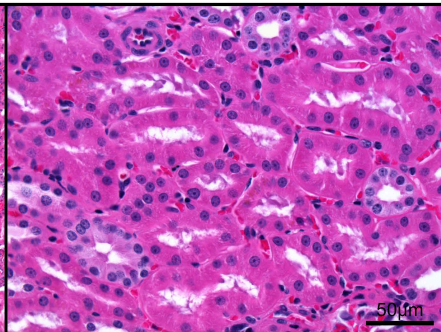

| Recipient ID: 33454    |                     |                      |         | Pre-transplant |   |   |   |   |   |   |   |   |   |   |   |   |   |   |   |   | Post-transplant |    |    |    |    |    |    |    |    |    |     |  |  |  |  |  |  |
|------------------------|---------------------|----------------------|---------|----------------|---|---|---|---|---|---|---|---|---|---|---|---|---|---|---|---|-----------------|----|----|----|----|----|----|----|----|----|-----|--|--|--|--|--|--|
| Treatment              | Purpose             | Dose                 | Timing  | Route          | 6 | 5 | 4 | 3 | 2 | 1 | 0 | 1 | 2 | 3 | 4 | 5 | 6 | 7 | 8 | 9 | 10              | 14 | 21 | 22 | 28 | 30 | 42 | 56 | 63 | 70 | ... |  |  |  |  |  |  |
| CD3-immunotoxin        | Immune conditioning | 0.025 mg/kg          | BID     | IV             |   |   |   |   |   |   |   |   |   |   |   |   |   |   |   |   |                 |    |    |    |    |    |    |    |    |    |     |  |  |  |  |  |  |
| Basilofan              | Immune conditioning | 6 mg/kg              | SID     | IV             |   |   |   |   |   |   |   |   |   |   |   |   |   |   |   |   |                 |    |    |    |    |    |    |    |    |    |     |  |  |  |  |  |  |
| Total Body Irradiation | Immune conditioning | 2 Gy @ 20cGy/m       | -       | -              |   |   |   |   |   |   |   |   |   |   |   |   |   |   |   |   |                 |    |    |    |    |    |    |    |    |    |     |  |  |  |  |  |  |
| Polymyxin B            | Gul decontamination | 1x10 <sup>6</sup> IU | SID     | PO             |   |   |   |   |   |   |   |   |   |   |   |   |   |   |   |   |                 |    |    |    |    |    |    |    |    |    |     |  |  |  |  |  |  |
| Neomycin sulfate       | Gul decontamination | 500 mg               | SID     | PO             |   |   |   |   |   |   |   |   |   |   |   |   |   |   |   |   |                 |    |    |    |    |    |    |    |    |    |     |  |  |  |  |  |  |
| Cefazolin              | Antibiotic          | 25 mg/kg             | BID     | IV             |   |   |   |   |   |   |   |   |   |   |   |   |   |   |   |   |                 |    |    |    |    |    |    |    |    |    |     |  |  |  |  |  |  |
| Tacrolimus             | GVHD prophylaxis    | 0.16 mg/kg/day       | Drip    | IV             |   |   |   |   |   |   |   |   |   |   |   |   |   |   |   |   |                 |    |    |    |    |    |    |    |    |    |     |  |  |  |  |  |  |
| Tacrolimus             | GVHD prophylaxis    | Up to 0.06 mg/kg     | SID     | IM             |   |   |   |   |   |   |   |   |   |   |   |   |   |   |   |   |                 |    |    |    |    |    |    |    |    |    |     |  |  |  |  |  |  |
| Belatacept             | GVHD prophylaxis    | 20 mg/kg             | SID     | IV             |   |   |   |   |   |   |   |   |   |   |   |   |   |   |   |   |                 |    |    |    |    |    |    |    |    |    |     |  |  |  |  |  |  |
| Cyclophosphamide       | GVHD prophylaxis    | 40 mg/kg             | SID     | IV             |   |   |   |   |   |   |   |   |   |   |   |   |   |   |   |   |                 |    |    |    |    |    |    |    |    |    |     |  |  |  |  |  |  |
| Valganciclovir         | Anti-CMV            | 10 mg/kg             | SID-BID | PO             |   |   |   |   |   |   |   |   |   |   |   |   |   |   |   |   |                 |    |    |    |    |    |    |    |    |    |     |  |  |  |  |  |  |

| Recipient ID: 34666    |                     |                      |        | Pre-transplant |   |   |   |   |   |   |   |   |   |   |   |   |   |   |   |   | Post-transplant |    |    |    |    |    |    |    |     |  |  |  |  |  |  |  |  |
|------------------------|---------------------|----------------------|--------|----------------|---|---|---|---|---|---|---|---|---|---|---|---|---|---|---|---|-----------------|----|----|----|----|----|----|----|-----|--|--|--|--|--|--|--|--|
| Treatment              | Purpose             | Dose                 | Timing | Route          | 6 | 5 | 4 | 3 | 2 | 1 | 0 | 1 | 2 | 3 | 4 | 5 | 6 | 7 | 8 | 9 | 10              | 14 | 21 | 28 | 29 | 42 | 69 | 76 | ... |  |  |  |  |  |  |  |  |
| CD3-immunotoxin        | Immune conditioning | 0.025 mg/kg          | BID    | IV             |   |   |   |   |   |   |   |   |   |   |   |   |   |   |   |   |                 |    |    |    |    |    |    |    |     |  |  |  |  |  |  |  |  |
| Basilofan              | Immune conditioning | 6 mg/kg              | SID    | IV             |   |   |   |   |   |   |   |   |   |   |   |   |   |   |   |   |                 |    |    |    |    |    |    |    |     |  |  |  |  |  |  |  |  |
| Total Body Irradiation | Immune conditioning | 2 Gy @ 20cGy/m       | -      | -              |   |   |   |   |   |   |   |   |   |   |   |   |   |   |   |   |                 |    |    |    |    |    |    |    |     |  |  |  |  |  |  |  |  |
| Polymyxin B            | Gul decontamination | 1x10 <sup>6</sup> IU | SID    | PO             |   |   |   |   |   |   |   |   |   |   |   |   |   |   |   |   |                 |    |    |    |    |    |    |    |     |  |  |  |  |  |  |  |  |
| Neomycin sulfate       | Gul decontamination | 500 mg               | SID    | PO             |   |   |   |   |   |   |   |   |   |   |   |   |   |   |   |   |                 |    |    |    |    |    |    |    |     |  |  |  |  |  |  |  |  |
| Cefazolin              | Antibiotic          | 25 mg/kg             | BID    | IV             |   |   |   |   |   |   |   |   |   |   |   |   |   |   |   |   |                 |    |    |    |    |    |    |    |     |  |  |  |  |  |  |  |  |
| Tacrolimus             | GVHD prophylaxis    | 0.16 mg/kg/day       | Drip   | IV             |   |   |   |   |   |   |   |   |   |   |   |   |   |   |   |   |                 |    |    |    |    |    |    |    |     |  |  |  |  |  |  |  |  |
| Tacrolimus             | GVHD prophylaxis    | Up to 0.06 mg/kg     | SID    | IM             |   |   |   |   |   |   |   |   |   |   |   |   |   |   |   |   |                 |    |    |    |    |    |    |    |     |  |  |  |  |  |  |  |  |
| Belatacept             | GVHD prophylaxis    | 20 mg/kg             | SID    | IV             |   |   |   |   |   |   |   |   |   |   |   |   |   |   |   |   |                 |    |    |    |    |    |    |    |     |  |  |  |  |  |  |  |  |
| Cyclophosphamide       | GVHD prophylaxis    | 40 mg/kg             | SID    | IV             |   |   |   |   |   |   |   |   |   |   |   |   |   |   |   |   |                 |    |    |    |    |    |    |    |     |  |  |  |  |  |  |  |  |

| Recipient ID: 33460    |                     |                      |         | Pre-transplant |   |   |   |   |   |   |   |   |   |   |   |   |   |   |   |   | Post-transplant |    |    |    |    |    |    |    |    |    |     |  |  |  |  |  |  |
|------------------------|---------------------|----------------------|---------|----------------|---|---|---|---|---|---|---|---|---|---|---|---|---|---|---|---|-----------------|----|----|----|----|----|----|----|----|----|-----|--|--|--|--|--|--|
| Treatment              | Purpose             | Dose                 | Timing  | Route          | 6 | 5 | 4 | 3 | 2 | 1 | 0 | 1 | 2 | 3 | 4 | 5 | 6 | 7 | 8 | 9 | 10              | 14 | 21 | 24 | 28 | 30 | 32 | 35 | 38 | 45 | ... |  |  |  |  |  |  |
| CD3-immunotoxin        | Immune conditioning | 0.025 mg/kg          | BID     | IV             |   |   |   |   |   |   |   |   |   |   |   |   |   |   |   |   |                 |    |    |    |    |    |    |    |    |    |     |  |  |  |  |  |  |
| Basilofan              | Immune conditioning | 6 mg/kg              | SID     | IV             |   |   |   |   |   |   |   |   |   |   |   |   |   |   |   |   |                 |    |    |    |    |    |    |    |    |    |     |  |  |  |  |  |  |
| Total Body Irradiation | Immune conditioning | 2 Gy @ 20cGy/m       | -       | -              |   |   |   |   |   |   |   |   |   |   |   |   |   |   |   |   |                 |    |    |    |    |    |    |    |    |    |     |  |  |  |  |  |  |
| Polymyxin B            | Gul decontamination | 1x10 <sup>6</sup> IU | SID     | PO             |   |   |   |   |   |   |   |   |   |   |   |   |   |   |   |   |                 |    |    |    |    |    |    |    |    |    |     |  |  |  |  |  |  |
| Neomycin sulfate       | Gul decontamination | 500 mg               | SID     | PO             |   |   |   |   |   |   |   |   |   |   |   |   |   |   |   |   |                 |    |    |    |    |    |    |    |    |    |     |  |  |  |  |  |  |
| Cefazolin              | Antibiotic          | 25 mg/kg             | BID     | IV             |   |   |   |   |   |   |   |   |   |   |   |   |   |   |   |   |                 |    |    |    |    |    |    |    |    |    |     |  |  |  |  |  |  |
| Tacrolimus             | GVHD prophylaxis    | Up to 0.06 mg/kg     | SID     | IM             |   |   |   |   |   |   |   |   |   |   |   |   |   |   |   |   |                 |    |    |    |    |    |    |    |    |    |     |  |  |  |  |  |  |
| Belatacept             | GVHD prophylaxis    | 20 mg/kg             | SID     | IV             |   |   |   |   |   |   |   |   |   |   |   |   |   |   |   |   |                 |    |    |    |    |    |    |    |    |    |     |  |  |  |  |  |  |
| Cyclophosphamide       | GVHD prophylaxis    | 40 mg/kg             | SID     | IV             |   |   |   |   |   |   |   |   |   |   |   |   |   |   |   |   |                 |    |    |    |    |    |    |    |    |    |     |  |  |  |  |  |  |
| Prednisone             | Tracheal intubation | Variable             | SID-BID | PO             |   |   |   |   |   |   |   |   |   |   |   |   |   |   |   |   |                 |    |    |    |    |    |    |    |    |    |     |  |  |  |  |  |  |
| Valganciclovir         | Anti-CMV            | 10 mg/kg             | SID-BID | PO             |   |   |   |   |   |   |   |   |   |   |   |   |   |   |   |   |                 |    |    |    |    |    |    |    |    |    |     |  |  |  |  |  |  |

| Recipient ID: 33461    |                     |                      |         | Pre-transplant |   |   |   |   |   |   |   |   |   |   |   |   |   |   |   |   | Post-transplant |    |    |    |    |    |    |    |    |    |     |     |     |  |  |  |  |
|------------------------|---------------------|----------------------|---------|----------------|---|---|---|---|---|---|---|---|---|---|---|---|---|---|---|---|-----------------|----|----|----|----|----|----|----|----|----|-----|-----|-----|--|--|--|--|
| Treatment              | Purpose             | Dose                 | Timing  | Route          | 6 | 5 | 4 | 3 | 2 | 1 | 0 | 1 | 2 | 3 | 4 | 5 | 6 | 7 | 8 | 9 | 10              | 14 | 22 | 24 | 29 | 31 | 35 | 46 | 53 | 68 | 133 | 183 | ... |  |  |  |  |
| CD3-immunotoxin        | Immune conditioning | 0.025 mg/kg          | BID     | IV             |   |   |   |   |   |   |   |   |   |   |   |   |   |   |   |   |                 |    |    |    |    |    |    |    |    |    |     |     |     |  |  |  |  |
| Basilofan              | Immune conditioning | 6 mg/kg              | SID     | IV             |   |   |   |   |   |   |   |   |   |   |   |   |   |   |   |   |                 |    |    |    |    |    |    |    |    |    |     |     |     |  |  |  |  |
| Total Body Irradiation | Immune conditioning | 2 Gy @ 20cGy/m       | -       | -              |   |   |   |   |   |   |   |   |   |   |   |   |   |   |   |   |                 |    |    |    |    |    |    |    |    |    |     |     |     |  |  |  |  |
| Polymyxin B            | Gul decontamination | 1x10 <sup>6</sup> IU | SID     | PO             |   |   |   |   |   |   |   |   |   |   |   |   |   |   |   |   |                 |    |    |    |    |    |    |    |    |    |     |     |     |  |  |  |  |
| Neomycin sulfate       | Gul decontamination | 500 mg               | SID     | PO             |   |   |   |   |   |   |   |   |   |   |   |   |   |   |   |   |                 |    |    |    |    |    |    |    |    |    |     |     |     |  |  |  |  |
| Cefazolin              | Antibiotic          | 25 mg/kg             | BID     | IV             |   |   |   |   |   |   |   |   |   |   |   |   |   |   |   |   |                 |    |    |    |    |    |    |    |    |    |     |     |     |  |  |  |  |
| Tacrolimus             | GVHD prophylaxis    | Up to 0.06 mg/kg     | SID     | IM             |   |   |   |   |   |   |   |   |   |   |   |   |   |   |   |   |                 |    |    |    |    |    |    |    |    |    |     |     |     |  |  |  |  |
| Belatacept             | GVHD prophylaxis    | 20 mg/kg             | SID     | IV             |   |   |   |   |   |   |   |   |   |   |   |   |   |   |   |   |                 |    |    |    |    |    |    |    |    |    |     |     |     |  |  |  |  |
| Cyclophosphamide       | GVHD prophylaxis    | 40 mg/kg             | SID     | IV             |   |   |   |   |   |   |   |   |   |   |   |   |   |   |   |   |                 |    |    |    |    |    |    |    |    |    |     |     |     |  |  |  |  |
| Valganciclovir         | Anti-CMV            | 10 mg/kg             | SID-BID | PO             |   |   |   |   |   |   |   |   |   |   |   |   |   |   |   |   |                 |    |    |    |    |    |    |    |    |    |     |     |     |  |  |  |  |

| Recipient ID: 35133                 |                     |                      |         | Pre-transplant |   |   |   |   |   |   |   |   |   |   |   |   |   |   |   |   | Post-transplant |    |    |    |    |    |    |    |    |    |    |    |     |  |  |  |  |
|-------------------------------------|---------------------|----------------------|---------|----------------|---|---|---|---|---|---|---|---|---|---|---|---|---|---|---|---|-----------------|----|----|----|----|----|----|----|----|----|----|----|-----|--|--|--|--|
| Treatment                           | Purpose             | Dose                 | Timing  | Route          | 6 | 5 | 4 | 3 | 2 | 1 | 0 | 1 | 2 | 3 | 4 | 5 | 6 | 7 | 8 | 9 | 10              | 14 | 15 | 21 | 28 | 35 | 50 | 53 | 91 | 92 | 93 | 94 | ... |  |  |  |  |
| CD3-immunotoxin                     | Immune conditioning | 0.025 mg/kg          | BID     | IV             |   |   |   |   |   |   |   |   |   |   |   |   |   |   |   |   |                 |    |    |    |    |    |    |    |    |    |    |    |     |  |  |  |  |
| Basilofan                           | Immune conditioning | 6 mg/kg              | SID     | IV             |   |   |   |   |   |   |   |   |   |   |   |   |   |   |   |   |                 |    |    |    |    |    |    |    |    |    |    |    |     |  |  |  |  |
| Total Body Irradiation              | Immune conditioning | 2 Gy @ 20cGy/m       | -       | -              |   |   |   |   |   |   |   |   |   |   |   |   |   |   |   |   |                 |    |    |    |    |    |    |    |    |    |    |    |     |  |  |  |  |
| Polymyxin B                         | Gul decontamination | 1x10 <sup>6</sup> IU | SID     | PO             |   |   |   |   |   |   |   |   |   |   |   |   |   |   |   |   |                 |    |    |    |    |    |    |    |    |    |    |    |     |  |  |  |  |
| Neomycin sulfate                    | Gul decontamination | 500 mg               | SID     | PO             |   |   |   |   |   |   |   |   |   |   |   |   |   |   |   |   |                 |    |    |    |    |    |    |    |    |    |    |    |     |  |  |  |  |
| Cefazolin                           | Antibiotic          | 25 mg/kg             | BID     | IV             |   |   |   |   |   |   |   |   |   |   |   |   |   |   |   |   |                 |    |    |    |    |    |    |    |    |    |    |    |     |  |  |  |  |
| Tacrolimus                          | GVHD prophylaxis    | Up to 0.06 mg/kg     | SID     | IM             |   |   |   |   |   |   |   |   |   |   |   |   |   |   |   |   |                 |    |    |    |    |    |    |    |    |    |    |    |     |  |  |  |  |
| Belatacept                          | GVHD prophylaxis    | 20 mg/kg             | SID     | IV             |   |   |   |   |   |   |   |   |   |   |   |   |   |   |   |   |                 |    |    |    |    |    |    |    |    |    |    |    |     |  |  |  |  |
| Cyclophosphamide                    | GVHD prophylaxis    | 40 mg/kg             | SID     | IV             |   |   |   |   |   |   |   |   |   |   |   |   |   |   |   |   |                 |    |    |    |    |    |    |    |    |    |    |    |     |  |  |  |  |
| Bicuculline                         | GVHD treatment      | Variable             | SID-BID | PO             |   |   |   |   |   |   |   |   |   |   |   |   |   |   |   |   |                 |    |    |    |    |    |    |    |    |    |    |    |     |  |  |  |  |
| Methylprednisolone sodium succinate | GVHD treatment      | Variable             | SID-BID | PO             |   |   |   |   |   |   |   |   |   |   |   |   |   |   |   |   |                 |    |    |    |    |    |    |    |    |    |    |    |     |  |  |  |  |
| Valganciclovir                      | Anti-CMV            | 10 mg/kg             | SID-BID | IV             |   |   |   |   |   |   |   |   |   |   |   |   |   |   |   |   |                 |    |    |    |    |    |    |    |    |    |    |    |     |  |  |  |  |

| Recipient ID: 35132    |                     |                      |        | Pre-transplant |   |   |   |   |   |   |   |   |   |   |   |   |   |   |   |   | Post-transplant |    |    |    |    |    |    |    |     |  |  |  |  |  |  |  |  |
|------------------------|---------------------|----------------------|--------|----------------|---|---|---|---|---|---|---|---|---|---|---|---|---|---|---|---|-----------------|----|----|----|----|----|----|----|-----|--|--|--|--|--|--|--|--|
| Treatment              | Purpose             | Dose                 | Timing | Route          | 6 | 5 | 4 | 3 | 2 | 1 | 0 | 1 | 2 | 3 | 4 | 5 | 6 | 7 | 8 | 9 | 10              | 14 | 21 | 28 | 35 | 44 | 45 | 53 | ... |  |  |  |  |  |  |  |  |
| CD3-immunotoxin        | Immune conditioning | 0.025 mg/kg          | BID    | IV             |   |   |   |   |   |   |   |   |   |   |   |   |   |   |   |   |                 |    |    |    |    |    |    |    |     |  |  |  |  |  |  |  |  |
| Basilofan              | Immune conditioning | 6 mg/kg              | SID    | IV             |   |   |   |   |   |   |   |   |   |   |   |   |   |   |   |   |                 |    |    |    |    |    |    |    |     |  |  |  |  |  |  |  |  |
| Total Body Irradiation | Immune conditioning | 2 Gy @ 23cGy/m       | -      | -              |   |   |   |   |   |   |   |   |   |   |   |   |   |   |   |   |                 |    |    |    |    |    |    |    |     |  |  |  |  |  |  |  |  |
| Polymyxin B            | Gul decontamination | 1x10 <sup>6</sup> IU | SID    | PO             |   |   |   |   |   |   |   |   |   |   |   |   |   |   |   |   |                 |    |    |    |    |    |    |    |     |  |  |  |  |  |  |  |  |
| Neomycin sulfate       | Gul decontamination | 500 mg               | SID    | PO             |   |   |   |   |   |   |   |   |   |   |   |   |   |   |   |   |                 |    |    |    |    |    |    |    |     |  |  |  |  |  |  |  |  |
| Cefazolin              | Antibiotic          | 25 mg/kg             | BID    | IV             |   |   |   |   |   |   |   |   |   |   |   |   |   |   |   |   |                 |    |    |    |    |    |    |    |     |  |  |  |  |  |  |  |  |
| Tacrolimus             | GVHD prophylaxis    | Up to 0.06 mg/kg     | SID    | IM             |   |   |   |   |   |   |   |   |   |   |   |   |   |   |   |   |                 |    |    |    |    |    |    |    |     |  |  |  |  |  |  |  |  |
| Belatacept             | GVHD prophylaxis    | 20 mg/kg             | SID    | IV             |   |   |   |   |   |   |   |   |   |   |   |   |   |   |   |   |                 |    |    |    |    |    |    |    |     |  |  |  |  |  |  |  |  |
| Cyclophosphamide       | GVHD prophylaxis    | 40 mg/kg             | SID    | IV             |   |   |   |   |   |   |   |   |   |   |   |   |   |   |   |   |                 |    |    |    |    |    |    |    |     |  |  |  |  |  |  |  |  |

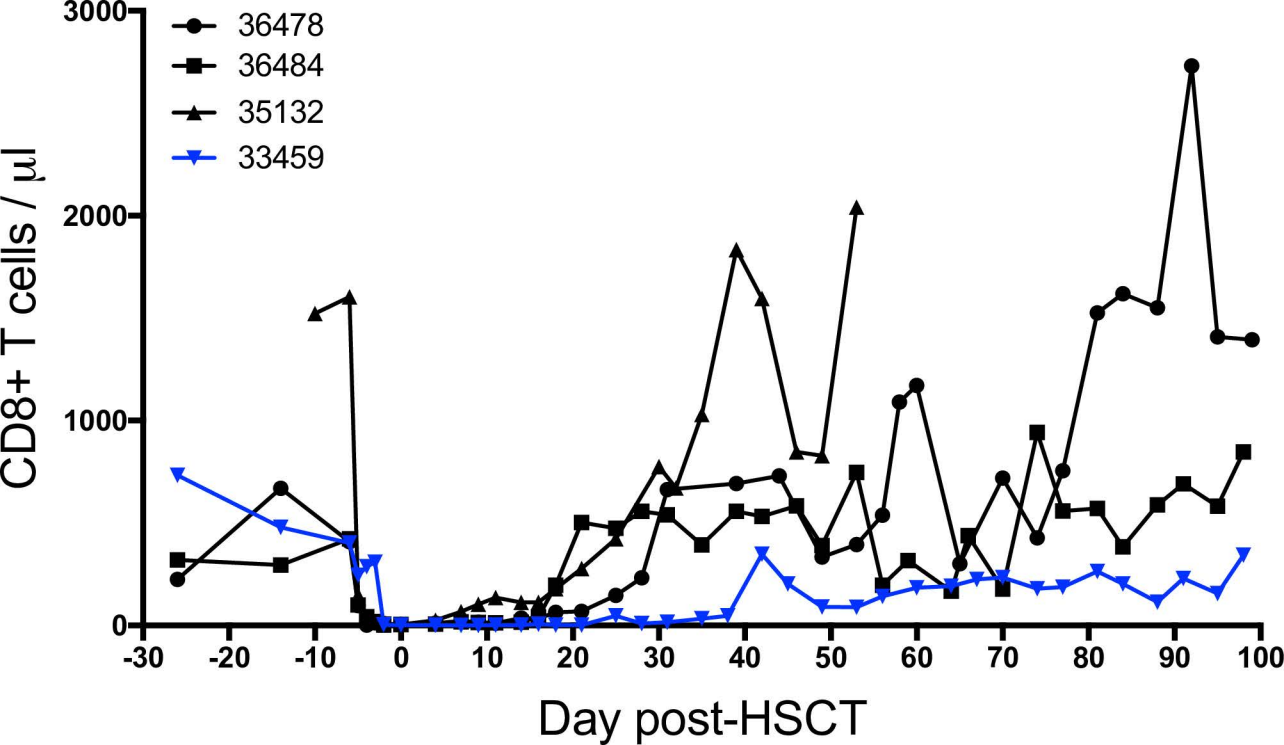

Supplement: NIHMS1065577-supplement-Supp_FigS1-5.pdf [file NIHMS1065577-supplement-Supp_FigS1-5.pdf]
